# Supplementary material for: Environmental exposures associated with early childhood recurrent wheezing in the mother and child in the environment birth cohort: a time-to-event study
Source: PubMed Central journal article supplement — Thorax. 2024 Jul 4;79(10):e221150. doi: 10.1136/thorax-2023-221150 (PMC11503139; doi:10.1136/thorax-2023-221150), 2024-07-04
Supplement: thorax-79-10-s001.pdf [file thorax-79-10-s001.pdf]

### Calculation of exposure metrics at the two timepoints

The adjustment approach was as follows: if a specific participant's first trimester occurred from January to March, for example, and the average concentration of NO<sub>x</sub> measurements over this period at the reference site was 10 µg/m<sup>3</sup>, while the annual average at the reference site was 5 µg/m<sup>3</sup>, a ratio of 2:1 for the first-trimester average to annual average was established for that participant. The annual average ambient concentration calculated for that participant's address by the hybrid model could then be doubled as an estimate of first-trimester average exposure. A similar adjustment was made to estimate average exposure during the month of birth for each participant.

EQUATION 1:

$$\frac{\text{1st trimester avg.conc at participant's address}}{\text{Annual avg.conc.at participant's address}} = \frac{\text{1st trimester avg.conc at reference site}}{\text{Annual avg.conc.at reference site}}$$

Therefore, 1st trimester avg conc. at participant's address

$$= \frac{\text{1st trimester avg. conc. at ref. site} \times \text{annual avg. conc. at participant's address}}{\text{Annual avg. conc. at ref. site}}$$

EQUATION 2:

$$\frac{\text{Birth month avg.conc.at participant's address}}{\text{Annual avg.conc.at participant's address}} = \frac{\text{Birth month avg.conc.at reference site}}{\text{Annual avg.conc.at reference site}}$$

Therefore, birth month avg conc. at participant's address

$$= \frac{\text{Birth month avg. conc. at ref. site} \times \text{annual avg. conc. at participant's address}}{\text{Annual avg. conc. at ref. site}}$$

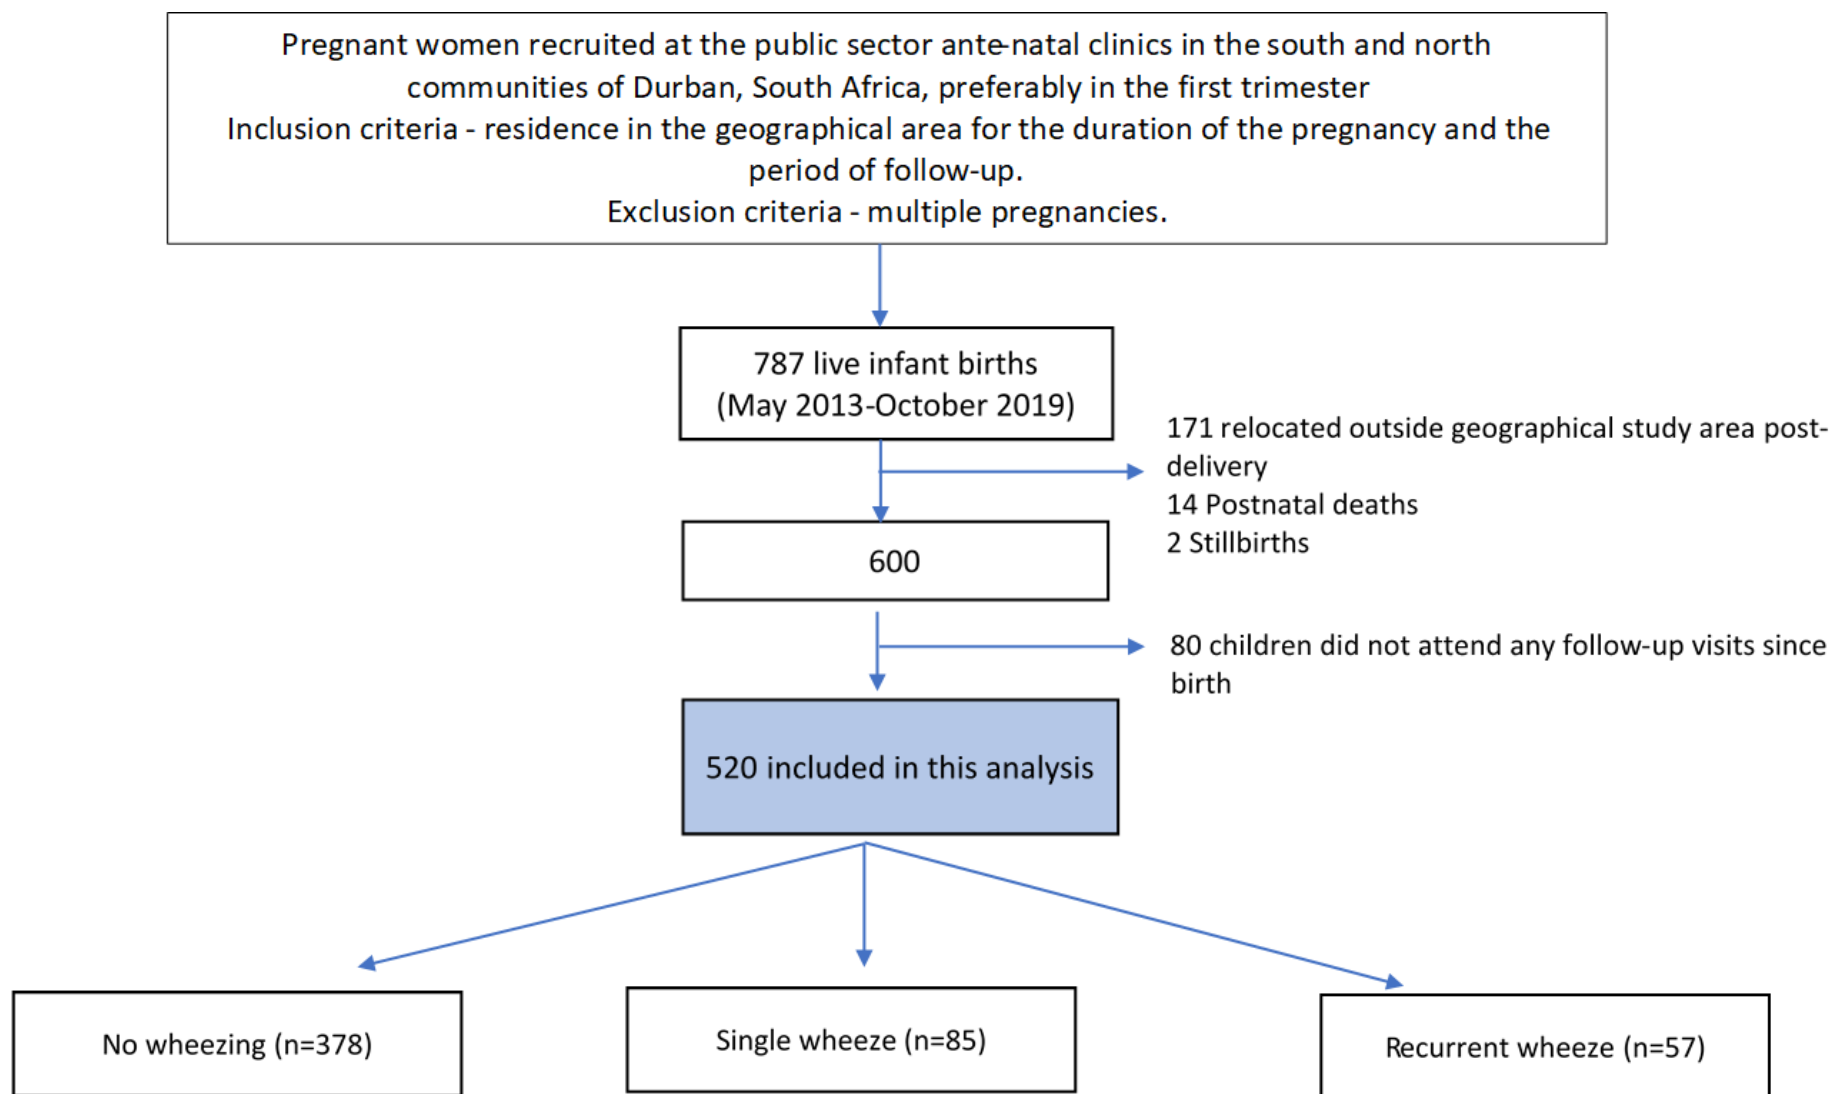

Supplementary Figure 1. Recruitment into MACE Cohort and Sample selection for wheeze outcome analysis

**Table S1: Demographics differences between participants included in this analysis (n=520) and those not included (n=80)\* within the MACE birth cohort**

| Characteristics                     | Study Participants (n=520) % | Excluded Cohort Members (n=80) % |
|-------------------------------------|------------------------------|----------------------------------|
|                                     | Mother education             |                                  |
| < Secondary school education        | 26.0                         | 26.2                             |
| Matric (high school graduate)       | 57.7                         | 47.5                             |
| College/ Technikon/ University      | 16.5                         | 26.2                             |
| Mother's yearly gross income (US\$) |                              |                                  |
| None                                | 49.2                         | 45.0                             |
| <\$ 650                             | 19.2                         | 16.2                             |
| \$ 650-\$2000                       | 18.1                         | 17.5                             |
| >\$2000                             | 10.8                         | 11.2                             |
| Refused to answer                   | 2.7                          | 10.0                             |
| Housing type                        |                              |                                  |
| Formal                              | 83.5                         | 91.2                             |
| Informal                            | 16.5                         | 8.8                              |
| Maternal age (mean (SD))            | 26.2 (6.0)                   | 26.5 (5.5)                       |
| Infant sex (male)                   | 53.6                         | 47.5                             |
| Birthweight (mean (SD))             | 3136.9 (545.6)               | 3168.9 (552.7)                   |

These participants did not attend any clinical assessments post delivery

There were no statistically significant differences between the included and excluded groups

**Table S2: Comparison of time to single and recurrent wheezing for risk factors of child wheezing**

| Variables                    | Single wheeze (n=85) |           |                  | Recurrent wheeze (n=57) |           |                  |
|------------------------------|----------------------|-----------|------------------|-------------------------|-----------|------------------|
|                              | Mean time (months)   | 95% CI    | Log-Rank P-value | Mean time (months)      | 95% CI    | Log-Rank P-value |
| Child gender                 |                      |           |                  |                         |           |                  |
| Male                         | 37.8                 | 35.7-39.9 | 0.169            | 45.6                    | 44.5-46.7 | 0.487            |
| Female                       | 39.6                 | 37.5-41.7 |                  | 46.1                    | 45.0-47.2 |                  |
| Antenatal ETS                |                      |           |                  |                         |           |                  |
| Yes                          | 37.1                 | 35.0-39.3 | 0.017*           | 45.4                    | 44.3-46.5 | 0.035*           |
| No                           | 40.5                 | 38.4-42.5 |                  | 46.5                    | 45.5-47.5 |                  |
| Maternal alcohol consumption |                      |           |                  |                         |           |                  |
| Yes                          | 35.0                 | 29.4-40.6 | 0.171            | 43.9                    | 40.6-47.3 | 0.229            |
| No                           | 39.1                 | 37.5-40.6 |                  | 46.0                    | 45.2-46.8 |                  |
| Family history of asthma     |                      |           |                  |                         |           |                  |
| Yes                          | 36.1                 | 32.2-40.0 | 0.210            | 47.2                    | 46.1-48.3 | 0.250            |
| No                           | 39.1                 | 37.5-40.7 |                  | 45.6                    | 44.6-46.5 |                  |
| Energy sources of cooking    |                      |           |                  |                         |           |                  |
| Biomass or fossil fuels      | 37.8                 | 29.1-46.5 | 0.928            | 42.9                    | 36.4-49.5 | 0.031*           |
| Electrical                   | 38.6                 | 37.1-40.2 |                  | 45.9                    | 45.2-46.7 |                  |

Key: (\*) The association is significant at  $\alpha=0.05$

**Table S3a: Cox-proportional hazards model for risk factors that contribute to single and recurrent episodes of childhood wheezing with a unit change in IQR of pollutants.**

| Variables                                      | Single Wheezing     |         | Recurrent Wheezing  |         |
|------------------------------------------------|---------------------|---------|---------------------|---------|
|                                                | Adjusted HR (95%CI) | P-value | Adjusted HR (95%CI) | P-value |
| Child gender                                   |                     |         |                     |         |
| Male                                           | 1.15 (0.80, 1.66)   | 0.447   |                     |         |
| Female                                         | 1                   |         |                     |         |
| Antenatal ETS                                  |                     |         |                     |         |
| Yes                                            | 1.56 (1.05, 2.31)   | 0.025   | 2.09 (0.93, 4.71)   | 0.073   |
| No                                             | 1                   |         |                     |         |
| Maternal alcohol consumption                   |                     |         |                     |         |
| Yes                                            | 1.31 (0.73, 2.32)   | 0.364   | 1.42 (0.54, 3.77)   | 0.476   |
| No                                             | 1                   |         |                     |         |
| Family history of asthma                       |                     |         |                     |         |
| Yes                                            | 1.33 (0.86, 2.06)   | 0.234   | 0.60 (0.21, 1.74)   | 0.350   |
| No                                             | 1                   |         |                     |         |
| Energy sources of cooking                      |                     |         |                     |         |
| Biomass or fossil fuels                        | 0.96 (0.35, 2.63)   | 0.945   | 2.55 (0.76, 8.55)   | 0.128   |
| Electricity                                    | 1                   |         |                     |         |
| Birth Month NO <sub>2</sub> <sup>#</sup>       | 1.14 (0.83, 1.58)   | 0.409   | 1.57 (0.85, 2.90)   | 0.148   |
| First Trimester NO <sub>2</sub> <sup>#</sup>   | 0.82 (0.62, 1.08)   | 0.156   | 0.83 (0.49, 1.41)   | 0.493   |
| Birth Month PM <sub>2.5</sub> <sup>#</sup>     | 1.13 (0.84, 1.53)   | 0.417   | 1.41 (0.79, 2.50)   | 0.239   |
| First Trimester PM <sub>2.5</sub> <sup>#</sup> | 0.79 (0.58,1.07)    | 0.131   | 0.71 (0.40, 1.23)   | 0.250   |

**Table 3b: Comparison of adjusted HR estimates between (1ug/m<sup>3</sup>) increase and one IQR increase in pollutant level (per 1ug/m<sup>3</sup> extracted from the original Table 3)**

|                                                | Single Wheezing (n=85)          |                   | Recurrent Wheezing (n=57)       |                   |
|------------------------------------------------|---------------------------------|-------------------|---------------------------------|-------------------|
|                                                | Per 1ug/m <sup>3</sup> increase | Per IQR increase  | Per 1ug/m <sup>3</sup> increase | Per IQR increase  |
| Birth Month NO <sub>2</sub> <sup>#</sup>       | 1.02 (0.99, 1.04)               | 1.14 (0.83, 1.58) | 1.03 (1.00, 1.08)               | 1.57 (0.85, 2.90) |
| First Trimester NO <sub>2</sub> <sup>#</sup>   | 0.97 (0.94, 1.00)               | 0.82 (0.62, 1.08) | 0.95 (0.91, 1.01)               | 0.83 (0.49, 1.41) |
| Birth Month PM <sub>2.5</sub> <sup>#</sup>     | 1.02 (0.98, 1.05)               | 1.13 (0.84, 1.53) | 1.04 (0.97, 1.10)               | 1.41 (0.79, 2.50) |
| First Trimester PM <sub>2.5</sub> <sup>#</sup> | 0.96 (0.92, 1.01)               | 0.79 (0.58,1.07)  | 0.95 (0.87, 1.03)               | 0.71 (0.40, 1.23) |

Because of concerns of masking effects due to our metrics used in the regression model, we ran a sensitivity analysis using the interquartile range (IQR). The estimates from this analysis is shown in the Table S3a and S3b: S3a shows the effects across all covariates, and S3b shows a comparison of the pollutant-related effects from the original metric (change in effect with each 1ug increase in pollutant) and the IQR estimates. As can be seen, the adjusted HR estimates for the exposure variables varied only slightly, but did not change in statistical significance. Because of this, we retained the 1ug metric rather than the IQR in the main text.

Child clinical questionnaire

| <b>Mother and Child in the Environment (MACE)</b><br><b>Child follow-up</b>                                                                                                                |                                                                                                                                                                                    |
|--------------------------------------------------------------------------------------------------------------------------------------------------------------------------------------------|------------------------------------------------------------------------------------------------------------------------------------------------------------------------------------|
| Date: : <u>   </u> / <u>   </u> / <u>   </u><br><div style="display: flex; justify-content: space-around; font-size: small;"> <span>Day</span> <span>Month</span> <span>Year</span> </div> |                                                                                                                                                                                    |
| MID: _____ CID: _____                                                                                                                                                                      |                                                                                                                                                                                    |
| 1. Date of Birth:                                                                                                                                                                          | <u>   </u> / <u>   </u> / <u>   </u><br><div style="display: flex; justify-content: space-around; font-size: small;"> <span>day</span> <span>month</span> <span>year</span> </div> |
| 2. Chronological age                                                                                                                                                                       | _____ months                                                                                                                                                                       |
| 3. Baby's birth weight                                                                                                                                                                     | _____ grams                                                                                                                                                                        |
| 4. Baby's birth Length                                                                                                                                                                     | <u>   </u> cm<br><input type="checkbox"/> _9 Unknown                                                                                                                               |
| 5. Baby's birth Head circumference                                                                                                                                                         | <u>   </u> cm<br><input type="checkbox"/> _9 Unknown                                                                                                                               |
| 6. Baby's current weight                                                                                                                                                                   | _____ kg                                                                                                                                                                           |
| 7. Baby's current height                                                                                                                                                                   | _____ cm                                                                                                                                                                           |
| 8. Baby's current OFC                                                                                                                                                                      | _____ cm                                                                                                                                                                           |
| 9. BABY'S CURRENT MUAC                                                                                                                                                                     | <u>   </u> cm<br><input type="checkbox"/> _9 Unknown                                                                                                                               |
| A) Classify MUAC                                                                                                                                                                           | <input type="checkbox"/> _1 Normal<br><input type="checkbox"/> _2 Moderate wasting<br><input type="checkbox"/> _3 Severe wasting                                                   |
| 10. Is the baby's Immunization up to date?<br>[INTERVIEWER TO CONFIRM WITH RTHC]                                                                                                           | <input type="checkbox"/> _1 Yes ( <b>If Yes, Skip to Q 12</b> )<br><input type="checkbox"/> _2 No                                                                                  |

|                                                                   |                                                                                                                                                                                                                                                                                                                                                                                                              |
|-------------------------------------------------------------------|--------------------------------------------------------------------------------------------------------------------------------------------------------------------------------------------------------------------------------------------------------------------------------------------------------------------------------------------------------------------------------------------------------------|
| 11. If No, why was your child not immunised?                      | <input type="checkbox"/> <sub>1</sub> Child unwell<br><input type="checkbox"/> <sub>2</sub> Mother missed visit<br><input type="checkbox"/> <sub>3</sub> Clinic had no stock<br><input type="checkbox"/> <sub>4</sub> Other _____                                                                                                                                                                            |
| <b>Nutrition: (Z score)</b>                                       |                                                                                                                                                                                                                                                                                                                                                                                                              |
| 12. Weight for age                                                | <input type="checkbox"/> <sub>1</sub> Overweight<br><input type="checkbox"/> <sub>2</sub> Normal<br><input type="checkbox"/> <sub>3</sub> Underweight for age<br><input type="checkbox"/> <sub>4</sub> Severely UWFA                                                                                                                                                                                         |
| 13. Height for age                                                | <input type="checkbox"/> <sub>1</sub> Very Tall<br><input type="checkbox"/> <sub>2</sub> Normal<br><input type="checkbox"/> <sub>3</sub> Stunted<br><input type="checkbox"/> <sub>4</sub> Severely Stunted                                                                                                                                                                                                   |
| 14. Weight for height                                             | <input type="checkbox"/> <sub>1</sub> Obese<br><input type="checkbox"/> <sub>2</sub> Overweight<br><input type="checkbox"/> <sub>3</sub> Normal<br><input type="checkbox"/> <sub>4</sub> Wasted (MAM)<br><input type="checkbox"/> <sub>5</sub> Severely wasted (SAM)                                                                                                                                         |
| 15. Classify Nutrition                                            | <input type="checkbox"/> <sub>1</sub> Normal<br><input type="checkbox"/> <sub>2</sub> Severe acute malnutrition<br><input type="checkbox"/> <sub>3</sub> Moderate malnutrition<br><input type="checkbox"/> <sub>4</sub> Mild malnutrition<br><input type="checkbox"/> <sub>5</sub> Severe wasting<br><input type="checkbox"/> <sub>6</sub> Moderate wasting<br><input type="checkbox"/> <sub>7</sub> Stunted |
| 16. OFC                                                           | <input type="checkbox"/> <sub>1</sub> Normal <b>(If Normal, Skip to Q 17)</b><br><input type="checkbox"/> <sub>2</sub> Abnormal                                                                                                                                                                                                                                                                              |
| a) If Abnormal OFC                                                | <input type="checkbox"/> <sub>1</sub> Microcephaly <input type="checkbox"/> <sub>2</sub> Macrocephaly                                                                                                                                                                                                                                                                                                        |
| <b>Development-</b>                                               |                                                                                                                                                                                                                                                                                                                                                                                                              |
| 17. Can he/she walk up and down the stairs with two feet per step | <input type="checkbox"/> <sub>1</sub> Yes <input type="checkbox"/> <sub>2</sub> No                                                                                                                                                                                                                                                                                                                           |
| 18. Can the child run?                                            | <input type="checkbox"/> <sub>1</sub> Yes <input type="checkbox"/> <sub>2</sub> No                                                                                                                                                                                                                                                                                                                           |
| 19. Can the child ride a tricycle?                                | <input type="checkbox"/> <sub>1</sub> Yes <input type="checkbox"/> <sub>2</sub> No                                                                                                                                                                                                                                                                                                                           |
| 20. Can he/she recognise colours                                  | <input type="checkbox"/> <sub>1</sub> Yes <input type="checkbox"/> <sub>2</sub> No                                                                                                                                                                                                                                                                                                                           |
| 21. Does he have hand preference?                                 | <input type="checkbox"/> <sub>1</sub> Yes <input type="checkbox"/> <sub>2</sub> No                                                                                                                                                                                                                                                                                                                           |

|                                                                               |                                                                                                                                                                                                     |
|-------------------------------------------------------------------------------|-----------------------------------------------------------------------------------------------------------------------------------------------------------------------------------------------------|
| 22. Can he make full sentences?                                               | <input type="checkbox"/> <sub>1</sub> Yes <input type="checkbox"/> <sub>2</sub> No                                                                                                                  |
| 23. Does he know at least 50 words?                                           | <input type="checkbox"/> <sub>1</sub> Yes <input type="checkbox"/> <sub>2</sub> No                                                                                                                  |
| 24. Can the baby feed himself/herself?                                        | <input type="checkbox"/> <sub>1</sub> Yes <input type="checkbox"/> <sub>2</sub> No                                                                                                                  |
| 25. Is the baby's development normal?                                         | <input type="checkbox"/> <sub>1</sub> Yes <b>(If Yes, Skip to Q 26)</b><br><input type="checkbox"/> <sub>2</sub> No                                                                                 |
| a) If No, Indicate the abnormality                                            | _____<br>_____<br>_____                                                                                                                                                                             |
| 26. What is the developmental age                                             | _____ (months)                                                                                                                                                                                      |
| 27. <b>Did the baby have any respiratory problems from 1- 2years of age ?</b> | <input type="checkbox"/> <sub>1</sub> Yes<br><input type="checkbox"/> <sub>2</sub> No <b>(If No, Skip to Q 29)</b><br><input type="checkbox"/> <sub>3</sub> Does not remember <b>(Skip to Q 29)</b> |
| 28. How many episodes did the child have?                                     | _____                                                                                                                                                                                               |
| Episode 1:                                                                    |                                                                                                                                                                                                     |
| a) When was the 1 <sup>st</sup> episode?                                      | _____ DATE<br>OR<br>_____ MONTHS AGO                                                                                                                                                                |
| b) How long did it last?                                                      | _____ DAYS<br><input type="checkbox"/> <sub>1</sub> Does not recall                                                                                                                                 |
| c) Did you seek medical attention?                                            | <input type="checkbox"/> <sub>1</sub> Clinic<br><input type="checkbox"/> <sub>2</sub> Hospital<br><input type="checkbox"/> <sub>3</sub> GP<br><input type="checkbox"/> <sub>4</sub> Self-medicated  |
| d) What treatment did the child receive?                                      | _____<br>_____                                                                                                                                                                                      |
| Episode 2:                                                                    |                                                                                                                                                                                                     |
| a) When was the 2nd episode?                                                  | _____ DATE<br>OR<br>_____ WEEKS AGO                                                                                                                                                                 |
| b) How long did it last?                                                      | _____ DAYS<br><input type="checkbox"/> <sub>1</sub> Does not recall                                                                                                                                 |
| c) Did you seek medical attention?                                            | <input type="checkbox"/> <sub>1</sub> Clinic<br><input type="checkbox"/> <sub>2</sub> Hospital<br><input type="checkbox"/> <sub>3</sub> GP<br><input type="checkbox"/> <sub>4</sub> Self-medicated  |
| d) What treatment did the child receive?                                      | _____                                                                                                                                                                                               |

|                                                                                                       |                                                                                                                                                                                |
|-------------------------------------------------------------------------------------------------------|--------------------------------------------------------------------------------------------------------------------------------------------------------------------------------|
|                                                                                                       |                                                                                                                                                                                |
| Episode 3:<br>a) When was the 3 <sup>rd</sup> episode?                                                | _____ DATE<br>OR<br>_____ WEEKS AGO                                                                                                                                            |
| b) How long did it last?                                                                              | _____ DAYS<br><input type="checkbox"/> Does not recall                                                                                                                         |
| c) Did you seek medical attention?                                                                    | <input type="checkbox"/> Clinic<br><input type="checkbox"/> Hospital<br><input type="checkbox"/> GP<br><input type="checkbox"/> Self-medicated                                 |
| d) What treatment did the child receive?                                                              | _____<br>_____                                                                                                                                                                 |
| 29. Does your baby currently have any of the following?                                               | <input type="checkbox"/> Cough<br><input type="checkbox"/> Blocked nose<br><input type="checkbox"/> Fever<br><input type="checkbox"/> None of the above ( <b>Skip to Q31</b> ) |
| 30. Did you seek medical attention?                                                                   | <input type="checkbox"/> Clinic<br><input type="checkbox"/> Hospital<br><input type="checkbox"/> GP<br><input type="checkbox"/> Self-medicated                                 |
| 31. What treatment did the child receive?                                                             | _____<br>_____                                                                                                                                                                 |
| 31. <b>Did your child ever have a wheeze in the last one year . (whistling sound from the chest)?</b> | <input type="checkbox"/> Yes<br><input type="checkbox"/> No ( <b>If No, Skip to Q 33</b> )<br><input type="checkbox"/> Does not remember ( <b>Skip to Q33</b> )                |
| 32. How many episodes did the child have?                                                             | _____                                                                                                                                                                          |
| Episode 1:<br>a) When was the 1 <sup>st</sup> episode?                                                | _____ DATE<br>OR<br>_____ WEEKS AGO                                                                                                                                            |
| b) How long did it last?                                                                              | _____ DAYS<br><input type="checkbox"/> Does not recall                                                                                                                         |
| c) Did you seek medical attention?                                                                    | <input type="checkbox"/> Clinic<br><input type="checkbox"/> Hospital<br><input type="checkbox"/> GP<br><input type="checkbox"/> Self-medicated                                 |
| d) What treatment did the child receive?                                                              | _____<br>_____                                                                                                                                                                 |



|                                             |                                                                                                                                                            |
|---------------------------------------------|------------------------------------------------------------------------------------------------------------------------------------------------------------|
| Episode 2:                                  |                                                                                                                                                            |
| a) When was the 2nd episode?                | _____ DATE<br>OR<br>_____ WEEKS AGO                                                                                                                        |
| b) How long did it last?                    | _____ DAYS<br><input type="checkbox"/> _1 Does not recall                                                                                                  |
| c) Did you seek medical attention?          | <input type="checkbox"/> _1 Clinic<br><input type="checkbox"/> _2 Hospital<br><input type="checkbox"/> _3 GP<br><input type="checkbox"/> _4 Self-medicated |
| d) What treatment did the child receive?    | _____<br>_____                                                                                                                                             |
| Episode 3:                                  |                                                                                                                                                            |
| a) When was the 3 <sup>rd</sup> episode?    | _____ DATE<br>OR<br>_____ WEEKS AGO                                                                                                                        |
| b) How long did it last?                    | _____ DAYS<br><input type="checkbox"/> _1 Does not recall                                                                                                  |
| c) Did you seek medical attention?          | <input type="checkbox"/> _1 Clinic<br><input type="checkbox"/> _2 Hospital<br><input type="checkbox"/> _3 GP<br><input type="checkbox"/> _4 Self-medicated |
| d) What treatment did the child receive?    | _____<br>_____                                                                                                                                             |
| 33. Does the baby have feeding difficulty   | <input type="checkbox"/> _1 Yes <input type="checkbox"/> _2 No                                                                                             |
| 34. Is the infant is HIV infected ?         | <input type="checkbox"/> _1 Yes <input type="checkbox"/> _2 No (If No,Skip to Q 36)                                                                        |
| 35. Is the child on antiretroviral therapy? | <input type="checkbox"/> _1 Yes <input type="checkbox"/> _2 No                                                                                             |
| a) If yes- what treatment is the baby on?   | _____<br>_____                                                                                                                                             |
| b) When was the treatment initiated?        |                                                                                                                                                            |
| 36. Is there a family history of TB?        | <input type="checkbox"/> _1 Yes <input type="checkbox"/> _2 No (If No,Skip to Q 37)                                                                        |
| a) Who has TB?                              | <input type="checkbox"/> _1 Child's mum<br><input type="checkbox"/> _2 Child's dad<br><input type="checkbox"/> _3 Child's siblings                         |
| b) Is the above person on medication?       | <input type="checkbox"/> _1 Yes<br><input type="checkbox"/> _2 No (If No,Skip to Q 37)                                                                     |

|                                                                       |                                                                                                                                                                                                                                                                                          |
|-----------------------------------------------------------------------|------------------------------------------------------------------------------------------------------------------------------------------------------------------------------------------------------------------------------------------------------------------------------------------|
| c) What medication is the person taking?                              | <hr/> <hr/> <hr/> <hr/>                                                                                                                                                                                                                                                                  |
| <b>Clinical assessment:</b>                                           |                                                                                                                                                                                                                                                                                          |
| 37. Temperature                                                       | <hr/>                                                                                                                                                                                                                                                                                    |
| 38. Respiratory rate (bpm)                                            | <hr/>                                                                                                                                                                                                                                                                                    |
| 39. Respiratory System                                                | <hr/> <hr/> <hr/>                                                                                                                                                                                                                                                                        |
| 40. Does the child have RDS today?                                    | <input type="checkbox"/> <sub>1</sub> Yes<br><input type="checkbox"/> <sub>2</sub> No                                                                                                                                                                                                    |
| 41. Does the child have an acute respiratory infection the currently? | <input type="checkbox"/> <sub>1</sub> Yes<br><input type="checkbox"/> <sub>2</sub> No <b>(If No, Skip to Q 42)</b>                                                                                                                                                                       |
| a) Indicate type of infection                                         | <input type="checkbox"/> <sub>1</sub> Severe pneumonia<br><input type="checkbox"/> <sub>2</sub> Pneumonia<br><input type="checkbox"/> <sub>3</sub> Cough or cold<br><input type="checkbox"/> <sub>4</sub> Recurrent wheeze<br><input type="checkbox"/> <sub>5</sub> Wheeze first episode |
| b) Did the child receive any of the following:                        | <input type="checkbox"/> <sub>1</sub> Anitibiotics<br><hr/> <input type="checkbox"/> <sub>2</sub> Bronchodilators<br><hr/> <input type="checkbox"/> <sub>3</sub> Inhaled bronchodilators<br><hr/> <input type="checkbox"/> <sub>4</sub> Inhaled steroids<br><hr/>                        |
| c) Does the child need admission?                                     | <input type="checkbox"/> <sub>1</sub> Yes<br><input type="checkbox"/> <sub>2</sub> No <b>(If No, Skip to Q 42)</b>                                                                                                                                                                       |
| d) If yes, please explain                                             | <hr/> <hr/>                                                                                                                                                                                                                                                                              |

|                                    |                                                                                                                                              |
|------------------------------------|----------------------------------------------------------------------------------------------------------------------------------------------|
| <b>42. ABDOMEN-</b>                |                                                                                                                                              |
| a) Hepatomegaly                    | <input type="checkbox"/> <sub>1</sub> Normal <input type="checkbox"/> <sub>2</sub> Abnormal                                                  |
| b) Splenomegaly                    | <input type="checkbox"/> <sub>1</sub> Normal <input type="checkbox"/> <sub>2</sub> Abnormal                                                  |
| <b>43. Central nervous System-</b> |                                                                                                                                              |
| a) Tone                            | <input type="checkbox"/> <sub>1</sub> Normal <input type="checkbox"/> <sub>2</sub> Increased <input type="checkbox"/> <sub>3</sub> Decreased |
| b) Reflexes                        | <input type="checkbox"/> <sub>1</sub> Normal <input type="checkbox"/> <sub>2</sub> Brisk <input type="checkbox"/> <sub>3</sub> Absent        |
| c) Power                           | <input type="checkbox"/> <sub>1</sub> Normal <b>(If Normal, Skip to (d))</b><br><input type="checkbox"/> <sub>2</sub> Abnormal               |
| a) If abnormal- grade the power    | _____                                                                                                                                        |
| d) Miscellaneous problems          | _____<br>_____<br>_____                                                                                                                      |
| e) Meds received                   | _____<br>_____<br>_____<br>_____<br>_____                                                                                                    |

|

## Mother and Child in the Environment (MACE) – Mother Questionnaire

1. Date: \_\_\_/\_\_\_/\_\_\_  
Day Month Year

2. Study Identification No.    -    -

|                                          |                                                                                                                        |
|------------------------------------------|------------------------------------------------------------------------------------------------------------------------|
| <p>3. Name of respondent:</p>            | <p>_____</p> <p>First</p> <p>_____</p> <p>Middle</p> <p>_____</p> <p>Surname</p>                                       |
| <p>4. Phone numbers:</p>                 | <p><b>home:</b> _____</p> <p><b>work:</b> _____</p> <p><b>cell:</b> _____</p> <p><b>other:</b> _____</p>               |
| <p>5. What is your physical address?</p> | <p>_____</p> <p>House No.</p> <p>_____</p> <p>Road/Street</p> <p>_____</p> <p>City</p> <p>_____</p> <p>Postal Code</p> |
| <p>6. How old are you?</p>               | <p>_____ years</p>                                                                                                     |
| <p>7. What is your date of birth?</p>    | <p>___/___/___</p> <p style="text-align: center;">day month year</p> <p><input type="checkbox"/> Refused</p>           |

|                                                                                                              |                                                                                                                                                                                                                                                                                                                                                                                                                                                                                                                                                                                                                                                                                                                                               |
|--------------------------------------------------------------------------------------------------------------|-----------------------------------------------------------------------------------------------------------------------------------------------------------------------------------------------------------------------------------------------------------------------------------------------------------------------------------------------------------------------------------------------------------------------------------------------------------------------------------------------------------------------------------------------------------------------------------------------------------------------------------------------------------------------------------------------------------------------------------------------|
| <p>8. What is your marital status?</p>                                                                       | <p><input type="checkbox"/><sub>1</sub> Married</p> <p><input type="checkbox"/><sub>2</sub> Living together</p> <p><input type="checkbox"/><sub>3</sub> Single</p> <p><input type="checkbox"/><sub>4</sub> Divorced</p> <p><input type="checkbox"/><sub>5</sub> Separated</p> <p><input type="checkbox"/><sub>6</sub> Widow</p> <p><input type="checkbox"/><sub>7</sub> Other _____</p>                                                                                                                                                                                                                                                                                                                                                       |
| <p>9. What is the highest grade or year of school you completed? <b>[READ CHOICES – select only one]</b></p> | <p><input type="checkbox"/><sub>1</sub> Never attended school or only pre-school</p> <p><input type="checkbox"/><sub>2</sub> Class 1 – Std 6 (Grades 1 through 8)</p> <p><input type="checkbox"/><sub>3</sub> Std 7 – Std 9 (Grades 9 through 11- Some high school)</p> <p><input type="checkbox"/><sub>4</sub> Std 10 / Matric (Grade 12 - High school graduate)</p> <p><input type="checkbox"/><sub>5</sub> College / technikon / university (1 year to 3 years - Some college or technical school)</p> <p><input type="checkbox"/><sub>6</sub> 4 years or more tertiary education (masters, doctorate, medical doctor)</p> <p><input type="checkbox"/><sub>7</sub> Other education</p> <p><input type="checkbox"/><sub>9</sub> Refused</p> |
| <p>10. What is the highest grade or year of school your baby's father completed? <b>[READ CHOICES]</b></p>   | <p><input type="checkbox"/><sub>1</sub> Never attended school or only pre-school</p> <p><input type="checkbox"/><sub>2</sub> Class 1 – Std 6 (Grades 1 through 8)</p> <p><input type="checkbox"/><sub>3</sub> Std 7 – Std 9 (Grades 9 through 11- Some high school)</p> <p><input type="checkbox"/><sub>4</sub> Std 10 / Matric (Grade 12 - High school graduate)</p> <p><input type="checkbox"/><sub>5</sub> College / technikon / university (1 year to 3 years - Some college or technical school)</p> <p><input type="checkbox"/><sub>6</sub> 4 years or more tertiary education (masters, doctorate, medical doctor)</p> <p><input type="checkbox"/><sub>7</sub> Other education</p> <p><input type="checkbox"/><sub>9</sub> Refused</p> |
| <p>11. Interviewer's Name:</p>                                                                               | <p>_____</p>                                                                                                                                                                                                                                                                                                                                                                                                                                                                                                                                                                                                                                                                                                                                  |

12. Interview time started:

Time: \_\_:\_\_ am/pm

**[INTRODUCTION: INTERVIEWER READS TO RESPONDENT]**

The purpose of this questionnaire is to collect information about your pregnancy and reproductive health . If there is a question you do not want to answer, please let me know and we can skip it. All of your responses are confidential and will not shown to anyone outside the study team without your written consent. If you wish to stop the interview at anytime, please advise me. We can continue at a later time at your convenience

| <b>A. HOUSEHOLD CONDITIONS</b>                                    |                                                                                                                                                                                                                                                                                                                                                                           |
|-------------------------------------------------------------------|---------------------------------------------------------------------------------------------------------------------------------------------------------------------------------------------------------------------------------------------------------------------------------------------------------------------------------------------------------------------------|
| 13. With whom do you live? <i>(Fill in one or several boxes.)</i> | <input type="checkbox"/> <sub>1</sub> Spouse<br><input type="checkbox"/> <sub>2</sub> Partner<br><input type="checkbox"/> <sub>3</sub> Parents<br><input type="checkbox"/> <sub>4</sub> Parents-in-law<br><input type="checkbox"/> <sub>5</sub> Children<br><input type="checkbox"/> <sub>6</sub> No one<br><input type="checkbox"/> <sub>88</sub> Others, describe _____ |
| 14. How many people including you live in your home?              | <input type="checkbox"/> <sub>1</sub> Number of people over 18 years<br><input type="checkbox"/> <sub>2</sub> Number of people between 12 and 18 years<br><input type="checkbox"/> <sub>3</sub> Number of people between 6 and 11 years<br><input type="checkbox"/> <sub>4</sub> Number of people under 6 years                                                           |
| 15. Usual language spoken at home:                                | <input type="checkbox"/> <sub>1</sub> English<br><input type="checkbox"/> <sub>2</sub> Zulu<br><input type="checkbox"/> <sub>3</sub> Xhosa                                                                                                                                                                                                                                |

|                                                                                                                                    |                                                                                                                                                                                                                                                                                                                                                                                                                                                                                                                                                                                                                                                                                                                                                    |
|------------------------------------------------------------------------------------------------------------------------------------|----------------------------------------------------------------------------------------------------------------------------------------------------------------------------------------------------------------------------------------------------------------------------------------------------------------------------------------------------------------------------------------------------------------------------------------------------------------------------------------------------------------------------------------------------------------------------------------------------------------------------------------------------------------------------------------------------------------------------------------------------|
|                                                                                                                                    | <input type="checkbox"/> <sub>4</sub> Afrikaans<br><input type="checkbox"/> <sub>88</sub> Other<br>(Specify: _____)                                                                                                                                                                                                                                                                                                                                                                                                                                                                                                                                                                                                                                |
| 16. How many of your children are at nursery school?                                                                               | _____<br>no. of children                                                                                                                                                                                                                                                                                                                                                                                                                                                                                                                                                                                                                                                                                                                           |
| 17. What is your yearly gross income? ( <i>Include child support, unemployment benefits and other allowances.</i> )                | <input type="checkbox"/> <sub>0</sub> No income<br><input type="checkbox"/> <sub>1</sub> Less than R1 000<br><input type="checkbox"/> <sub>2</sub> R1 001-2 000<br><input type="checkbox"/> <sub>3</sub> R2 001-5 000<br><input type="checkbox"/> <sub>4</sub> R5 001-10 000<br><input type="checkbox"/> <sub>5</sub> R10 001–20 000<br><input type="checkbox"/> <sub>6</sub> R20 001–30 000<br><input type="checkbox"/> <sub>7</sub> R30 001–50 000<br><input type="checkbox"/> <sub>8</sub> R50 001–75 000<br><input type="checkbox"/> <sub>9</sub> R75 001–100 000<br><input type="checkbox"/> <sub>10</sub> R100 000-150 000<br><input type="checkbox"/> <sub>11</sub> R150 001 and above                                                      |
| 18. What is the baby's father's yearly gross income? ( <i>Include child support, unemployment benefits and other allowances.</i> ) | <input type="checkbox"/> <sub>0</sub> No income<br><input type="checkbox"/> <sub>1</sub> Less than R1 000<br><input type="checkbox"/> <sub>2</sub> R1 001-2 000<br><input type="checkbox"/> <sub>3</sub> R2 001-5 000<br><input type="checkbox"/> <sub>4</sub> R5 001-10 000<br><input type="checkbox"/> <sub>5</sub> R10 001–20 000<br><input type="checkbox"/> <sub>6</sub> R20 001–30 000<br><input type="checkbox"/> <sub>7</sub> R30 001–50 000<br><input type="checkbox"/> <sub>8</sub> R50 001–75 000<br><input type="checkbox"/> <sub>9</sub> R75 001–100 000<br><input type="checkbox"/> <sub>10</sub> R100 000-150 000<br><input type="checkbox"/> <sub>11</sub> R150 001 and above<br><input type="checkbox"/> <sub>99</sub> Don't know |
| 19. Is it possible for your household to manage financially without your income?                                                   | <input type="checkbox"/> <sub>0</sub> not applicable, no income received<br><input type="checkbox"/> <sub>1</sub> No<br><input type="checkbox"/> <sub>2</sub> Yes, but with difficulty                                                                                                                                                                                                                                                                                                                                                                                                                                                                                                                                                             |

|                                                                                                                                                                |                                                                                                                                                                                                                                                                                                                                                                                                                                                                                        |
|----------------------------------------------------------------------------------------------------------------------------------------------------------------|----------------------------------------------------------------------------------------------------------------------------------------------------------------------------------------------------------------------------------------------------------------------------------------------------------------------------------------------------------------------------------------------------------------------------------------------------------------------------------------|
|                                                                                                                                                                | <input type="checkbox"/> <sub>3</sub> Yes, without difficulty                                                                                                                                                                                                                                                                                                                                                                                                                          |
| 20. What type of housing do you live in?                                                                                                                       | <input type="checkbox"/> <sub>1</sub> Detached house<br><input type="checkbox"/> <sub>2</sub> Farm<br><input type="checkbox"/> <sub>3</sub> Semidetached<br><input type="checkbox"/> <sub>4</sub> Flat<br><input type="checkbox"/> <sub>5</sub> Maisonette<br><input type="checkbox"/> <sub>6</sub> Terraced flat<br><input type="checkbox"/> <sub>7</sub> Apartment building<br><input type="checkbox"/> <sub>8</sub> Townhouse<br><input type="checkbox"/> <sub>88</sub> Other _____ |
| 21. Has there been water damage, visible signs of fungus/mildew or a smell of mildew in your home in the past 3 months? <i>(Fill in one or several boxes.)</i> | <input type="checkbox"/> <sub>1</sub> No<br><input type="checkbox"/> <sub>2</sub> Yes, water damage<br><input type="checkbox"/> <sub>3</sub> Yes, signs of fungus and mould<br><input type="checkbox"/> <sub>4</sub> Yes, a smell of mildew                                                                                                                                                                                                                                            |
| 22. How many times have you moved in the last 3 years?                                                                                                         | _____ times                                                                                                                                                                                                                                                                                                                                                                                                                                                                            |
| 23. What year was this house/structure originally built?                                                                                                       | _____<br>year<br><input type="checkbox"/> <sub>99</sub> don't know                                                                                                                                                                                                                                                                                                                                                                                                                     |
| <b>IF RESPONDENT IS UNSURE ASK:</b><br><br>24. Would you say it was built:                                                                                     | <input type="checkbox"/> <sub>1</sub> before 1960<br><input type="checkbox"/> <sub>2</sub> between 1960 and 1975<br><input type="checkbox"/> <sub>3</sub> after 1975                                                                                                                                                                                                                                                                                                                   |
| 25. How many rooms are there in your home? (counting the kitchen, but not the bathroom or toilet)                                                              | _____ rooms                                                                                                                                                                                                                                                                                                                                                                                                                                                                            |
| 26. How long have you lived at this address?                                                                                                                   | _____<br>years<br><input type="checkbox"/> <sub>1</sub> less than 1 year                                                                                                                                                                                                                                                                                                                                                                                                               |
| 27. Is your home drinking water from the tap or from a river or dam?                                                                                           | <input type="checkbox"/> <sub>1</sub> tap<br><input type="checkbox"/> <sub>2</sub> river or dam<br><input type="checkbox"/> <sub>3</sub> well<br><input type="checkbox"/> <sub>88</sub> other, please specify:<br>_____                                                                                                                                                                                                                                                                |
| 28. Do any pets live in this home?                                                                                                                             | <input type="checkbox"/> <sub>1</sub> Yes<br><input type="checkbox"/> <sub>2</sub> No <b>[If no, skip to Q31]</b>                                                                                                                                                                                                                                                                                                                                                                      |
| 29. What kind of pets live here?                                                                                                                               |                                                                                                                                                                                                                                                                                                                                                                                                                                                                                        |



|                                                                                               |                                                                                                                                                                                                                                                                                                                                                 |
|-----------------------------------------------------------------------------------------------|-------------------------------------------------------------------------------------------------------------------------------------------------------------------------------------------------------------------------------------------------------------------------------------------------------------------------------------------------|
| (a). a dog?                                                                                   | <input type="checkbox"/> <sub>1</sub> Yes<br><input type="checkbox"/> <sub>2</sub> No                                                                                                                                                                                                                                                           |
| (b). a cat?                                                                                   | <input type="checkbox"/> <sub>1</sub> Yes<br><input type="checkbox"/> <sub>2</sub> No                                                                                                                                                                                                                                                           |
| (c). a bird?                                                                                  | <input type="checkbox"/> <sub>1</sub> Yes<br><input type="checkbox"/> <sub>2</sub> No                                                                                                                                                                                                                                                           |
| (d). any other pet(s)                                                                         | <input type="checkbox"/> <sub>1</sub> Yes<br><input type="checkbox"/> <sub>2</sub> No<br><input type="checkbox"/> <sub>88</sub> please specify: _____                                                                                                                                                                                           |
| 30. During the past 12 months was a furnace that forces out hot air used to heat this house?  | <input type="checkbox"/> <sub>1</sub> Yes<br><input type="checkbox"/> <sub>2</sub> No <b>[If no, skip to Q30]</b><br><input type="checkbox"/> <sub>99</sub> don't know                                                                                                                                                                          |
| (a). Was this hot air furnace fueled by                                                       | <input type="checkbox"/> <sub>0</sub> not applicable – no furnace<br><input type="checkbox"/> <sub>1</sub> oil<br><input type="checkbox"/> <sub>2</sub> gas<br><input type="checkbox"/> <sub>3</sub> electricity<br><input type="checkbox"/> <sub>88</sub> other, please specify:<br>_____<br><input type="checkbox"/> <sub>99</sub> don't know |
| 31. During the past 12 months was a room heater used to heat one or more rooms in this house? | <input type="checkbox"/> <sub>1</sub> Yes<br><input type="checkbox"/> <sub>2</sub> No<br><input type="checkbox"/> <sub>99</sub> don't know                                                                                                                                                                                                      |
| (a). Was this heater fueled by                                                                | <input type="checkbox"/> <sub>0</sub> not applicable – no furnace<br><input type="checkbox"/> <sub>1</sub> paraffin<br><input type="checkbox"/> <sub>2</sub> gas<br><input type="checkbox"/> <sub>3</sub> electricity<br><input type="checkbox"/> <sub>4</sub> wood<br><input type="checkbox"/> <sub>5</sub> coal                               |

|                                                                                           |                                                                                                                                                                                                                                                                                                                                                                             |                                       |                         |
|-------------------------------------------------------------------------------------------|-----------------------------------------------------------------------------------------------------------------------------------------------------------------------------------------------------------------------------------------------------------------------------------------------------------------------------------------------------------------------------|---------------------------------------|-------------------------|
|                                                                                           | <input type="checkbox"/> <sub>88</sub> other, please specify:<br>_____<br><input type="checkbox"/> <sub>88</sub> don't know                                                                                                                                                                                                                                                 |                                       |                         |
| 32. During the past 12 months was one or more wood stoves used in this house?             | <input type="checkbox"/> <sub>1</sub> Yes<br><input type="checkbox"/> <sub>2</sub> No<br><input type="checkbox"/> <sub>99</sub> Don't know                                                                                                                                                                                                                                  |                                       |                         |
| 33. During the past 12 months was a fireplace used to heat the rooms in this house?       | <input type="checkbox"/> <sub>1</sub> Yes<br><input type="checkbox"/> <sub>2</sub> No<br><input type="checkbox"/> <sub>99</sub> Don't know                                                                                                                                                                                                                                  |                                       |                         |
| 34. During the past 12 months was the stove or oven ever used to heat this house?         | <input type="checkbox"/> <sub>1</sub> Yes<br><input type="checkbox"/> <sub>2</sub> No<br><input type="checkbox"/> <sub>99</sub> Don't know                                                                                                                                                                                                                                  |                                       |                         |
| 35. Is a stove or oven used for cooking in this house?                                    | <input type="checkbox"/> <sub>1</sub> Yes<br><input type="checkbox"/> <sub>2</sub> No<br><input type="checkbox"/> <sub>99</sub> Don't know                                                                                                                                                                                                                                  |                                       |                         |
| (a). What is the primary source of heat for this stove or oven?                           | <input type="checkbox"/> <sub>1</sub> paraffin<br><input type="checkbox"/> <sub>2</sub> gas<br><input type="checkbox"/> <sub>3</sub> electricity<br><input type="checkbox"/> <sub>4</sub> wood<br><input type="checkbox"/> <sub>5</sub> coal<br><input type="checkbox"/> <sub>88</sub> other, please specify:<br>_____<br><input type="checkbox"/> <sub>99</sub> don't know |                                       |                         |
| <b>B. FAMILY SMOKING CHARACTERISTICS</b>                                                  |                                                                                                                                                                                                                                                                                                                                                                             |                                       |                         |
| 36. Does anyone who lives here smoke cigarettes in the home?                              | <input type="checkbox"/> <sub>1</sub> Yes<br><input type="checkbox"/> <sub>2</sub> No <b>[If no, skip to Q37]</b>                                                                                                                                                                                                                                                           |                                       |                         |
| If yes, for each member of the household who smokes, please complete the following table: |                                                                                                                                                                                                                                                                                                                                                                             |                                       |                         |
| First name                                                                                | Surname                                                                                                                                                                                                                                                                                                                                                                     | Cigarettes smoked per day in the home | Number of years smoking |
| <b>a.i</b>                                                                                | <b>a.ii</b>                                                                                                                                                                                                                                                                                                                                                                 | <b>a.iii</b>                          | <b>a.iv</b>             |

|    |    |    |    |
|----|----|----|----|
| b. | b. | b. | b. |
| c. | c. | c. | c. |
| d. | d. | d. | d. |
| e. | e. | e. | e. |
| f. | f. | f. | f. |
| g. | g. | g. | g. |

**C. MENSTRUAL HISTORY**

|                                                                                                                                  |                                                                                                                                                                                    |
|----------------------------------------------------------------------------------------------------------------------------------|------------------------------------------------------------------------------------------------------------------------------------------------------------------------------------|
| 37. How old were you when you had your first menstrual period?                                                                   | _____ years<br>age                                                                                                                                                                 |
| 38. How many days between the first day in your menstrual period and the first day in your next menstrual period?                | _____ days                                                                                                                                                                         |
| 39. Were your periods regular the year before you became pregnant?                                                               | <input type="checkbox"/> <sub>1</sub> Yes<br><input type="checkbox"/> <sub>2</sub> No                                                                                              |
| 40. During the last year before you became pregnant, did you lose your period for more than three months without being pregnant? | <input type="checkbox"/> <sub>1</sub> Yes, due to another pregnancy<br><input type="checkbox"/> <sub>2</sub> Yes, due to other reasons<br><input type="checkbox"/> <sub>3</sub> No |
| 41. Date of first day of last menstrual period                                                                                   | ____/____/20____<br>Day/month/year                                                                                                                                                 |
| 42. Did your last menstrual period come at the expected time                                                                     | <input type="checkbox"/> <sub>1</sub> Yes<br><input type="checkbox"/> <sub>2</sub> No                                                                                              |
| 43. Are you certain about the date of first day of last menstrual period?                                                        | <input type="checkbox"/> <sub>1</sub> Certain<br><input type="checkbox"/> <sub>2</sub> Uncertain                                                                                   |
| 44. Describe the duration, amount of bleeding and period pains of your last period                                               |                                                                                                                                                                                    |
| (a). Was the duration                                                                                                            | <input type="checkbox"/> <sub>1</sub> Usual<br><input type="checkbox"/> <sub>2</sub> More than usual<br><input type="checkbox"/> <sub>3</sub> Less than usual                      |

|                                                                                                                                                      |                                                                                                                                                                                                                                                                                                                                                                                                                                                                                                                                                                                                                                                                                                                                                                      |
|------------------------------------------------------------------------------------------------------------------------------------------------------|----------------------------------------------------------------------------------------------------------------------------------------------------------------------------------------------------------------------------------------------------------------------------------------------------------------------------------------------------------------------------------------------------------------------------------------------------------------------------------------------------------------------------------------------------------------------------------------------------------------------------------------------------------------------------------------------------------------------------------------------------------------------|
| (b). Was the bleeding                                                                                                                                | <input type="checkbox"/> <sub>1</sub> Usual<br><input type="checkbox"/> <sub>2</sub> More than usual<br><input type="checkbox"/> <sub>3</sub> Less than usual                                                                                                                                                                                                                                                                                                                                                                                                                                                                                                                                                                                                        |
| (c). Was the pain                                                                                                                                    | <input type="checkbox"/> <sub>1</sub> Usual<br><input type="checkbox"/> <sub>2</sub> More than usual<br><input type="checkbox"/> <sub>3</sub> Less than usual                                                                                                                                                                                                                                                                                                                                                                                                                                                                                                                                                                                                        |
| <b>D. CONTRACEPTION AND REPRODUCTIVE HISTORY</b>                                                                                                     |                                                                                                                                                                                                                                                                                                                                                                                                                                                                                                                                                                                                                                                                                                                                                                      |
| 45. Have you/your partner at any time during the last year used the following methods to avoid becoming pregnant? ( <i>Fill in all that apply.</i> ) | <input type="checkbox"/> <sub>1</sub> Condom<br><input type="checkbox"/> <sub>2</sub> Diaphragm<br><input type="checkbox"/> <sub>3</sub> IUD<br><input type="checkbox"/> <sub>4</sub> Hormone IUD<br><input type="checkbox"/> <sub>5</sub> Hormone injection<br><input type="checkbox"/> <sub>6</sub> Mini pill<br><input type="checkbox"/> <sub>7</sub> Pill<br><input type="checkbox"/> <sub>8</sub> Spermicides (foam, suppositories, cream)<br><input type="checkbox"/> <sub>9</sub> Safe period<br><input type="checkbox"/> <sub>10</sub> Withdrawal<br><input type="checkbox"/> <sub>11</sub> No such methods<br><input type="checkbox"/> <sub>88</sub> Other                                                                                                  |
| 46. If you have used the pill/mini-pill, how long have you used them?                                                                                | <i>Pill</i><br><input type="checkbox"/> <sub>0</sub> never used<br><input type="checkbox"/> <sub>1</sub> Less than one year<br><input type="checkbox"/> <sub>2</sub> 1-3 years<br><input type="checkbox"/> <sub>3</sub> 4-6 years<br><input type="checkbox"/> <sub>4</sub> 7-9 years<br><input type="checkbox"/> <sub>5</sub> 10 years or more<br><br><i>Mini-pill</i><br><input type="checkbox"/> <sub>00</sub> never used<br><input type="checkbox"/> <sub>6</sub> Less than one year<br><input type="checkbox"/> <sub>7</sub> 1-3 years<br><input type="checkbox"/> <sub>8</sub> 4-6 years<br><input type="checkbox"/> <sub>9</sub> 7-9 years<br><input type="checkbox"/> <sub>10</sub> 10 years or more<br><b>[If Pill or Mini pill never used, skip to Q50]</b> |
| 47. If you have used the pill/mini-pill, how old were you when you first used it?                                                                    | _____ years old                                                                                                                                                                                                                                                                                                                                                                                                                                                                                                                                                                                                                                                                                                                                                      |
| 48. Were you taking the pill/mini-pill during the last 4 months before this pregnancy?                                                               | <input type="checkbox"/> <sub>1</sub> Yes<br><input type="checkbox"/> <sub>2</sub> No                                                                                                                                                                                                                                                                                                                                                                                                                                                                                                                                                                                                                                                                                |
| 49. If yes, how long before your last menstrual period did you stop taking the pill/mini-pill?                                                       | _____ weeks                                                                                                                                                                                                                                                                                                                                                                                                                                                                                                                                                                                                                                                                                                                                                          |
| 50. Was this pregnancy planned?                                                                                                                      | <input type="checkbox"/> <sub>1</sub> Yes                                                                                                                                                                                                                                                                                                                                                                                                                                                                                                                                                                                                                                                                                                                            |

|                                                                                                                       |                                                                                                                                                                                                                                                                                                                                                                                                                                                                                                                                                                                                                 |
|-----------------------------------------------------------------------------------------------------------------------|-----------------------------------------------------------------------------------------------------------------------------------------------------------------------------------------------------------------------------------------------------------------------------------------------------------------------------------------------------------------------------------------------------------------------------------------------------------------------------------------------------------------------------------------------------------------------------------------------------------------|
|                                                                                                                       | <input type="checkbox"/> <sub>2</sub> No                                                                                                                                                                                                                                                                                                                                                                                                                                                                                                                                                                        |
| (a). If yes, how many months did you have regular intercourse without contraception before you became pregnant?       | <input type="checkbox"/> <sub>1</sub> Less than 1 month<br><input type="checkbox"/> <sub>2</sub> 1-2 months<br><input type="checkbox"/> <sub>3</sub> 3 months or more<br><input type="checkbox"/> <sub>4</sub> Number of months if more than 3 _____                                                                                                                                                                                                                                                                                                                                                            |
| 52. Did you become pregnant even though you or your partner used contraceptives                                       | <input type="checkbox"/> <sub>1</sub> Yes<br><input type="checkbox"/> <sub>2</sub> No <b>[If no, skip to Q55]</b>                                                                                                                                                                                                                                                                                                                                                                                                                                                                                               |
| 53. If yes, which type of contraceptives were used? (Fill in all that apply.)                                         | <input type="checkbox"/> <sub>1</sub> Condom<br><input type="checkbox"/> <sub>2</sub> Diaphragm<br><input type="checkbox"/> <sub>3</sub> IUD<br><input type="checkbox"/> <sub>4</sub> Hormone IUD<br><input type="checkbox"/> <sub>5</sub> Hormone injection<br><input type="checkbox"/> <sub>6</sub> Mini pill<br><input type="checkbox"/> <sub>7</sub> Pill<br><input type="checkbox"/> <sub>7</sub> Spermicides (foam, suppositories, cream)<br><input type="checkbox"/> <sub>9</sub> Safe period<br><input type="checkbox"/> <sub>10</sub> Withdrawal<br><input type="checkbox"/> <sub>88</sub> Other _____ |
| 54. If you became pregnant while using an IUD, has it now been removed?                                               | <input type="checkbox"/> <sub>1</sub> Yes<br><input type="checkbox"/> <sub>2</sub> No                                                                                                                                                                                                                                                                                                                                                                                                                                                                                                                           |
| 55. How long have you and the baby's father had a sexual relationship?                                                | _____ months or _____ years                                                                                                                                                                                                                                                                                                                                                                                                                                                                                                                                                                                     |
| 56. How often did you have sexual intercourse during the four weeks before you became pregnant ?                      | <input type="checkbox"/> <sub>1</sub> Every day<br><input type="checkbox"/> <sub>2</sub> 5-6 times a week<br><input type="checkbox"/> <sub>3</sub> 3-4 times a week<br><input type="checkbox"/> <sub>4</sub> 1-2 times a week<br><input type="checkbox"/> <sub>5</sub> 1-2 times every two weeks<br><input type="checkbox"/> <sub>6</sub> Less than 1-2 times every 2 weeks<br><input type="checkbox"/> <sub>7</sub> Never                                                                                                                                                                                      |
| 57. Have you ever been treated for infertility?                                                                       | <input type="checkbox"/> <sub>1</sub> Yes<br><input type="checkbox"/> <sub>2</sub> No <b>[If no, skip to Q59]</b>                                                                                                                                                                                                                                                                                                                                                                                                                                                                                               |
| 58. If yes, was it in connection with this pregnancy or an earlier pregnancy and what type of treatment did you have? | <input type="checkbox"/> <sub>1</sub> Fallopian tube surgery<br><input type="checkbox"/> <sub>2</sub> Other surgery<br><input type="checkbox"/> <sub>3</sub> Medication for endometriosis<br><input type="checkbox"/> <sub>4</sub> Hormone treatment<br><input type="checkbox"/> <sub>5</sub> Insemination (injection of sperm)<br><input type="checkbox"/> <sub>6</sub> Test-tube method<br><input type="checkbox"/> <sub>88</sub> Other                                                                                                                                                                       |
| 59. Have you been given information about amniocentesis?                                                              | <input type="checkbox"/> <sub>1</sub> Yes<br><input type="checkbox"/> <sub>2</sub> No                                                                                                                                                                                                                                                                                                                                                                                                                                                                                                                           |
| 60. What was your blood pressure at your first antenatal visit? (Check medical card.)                                 | <input type="checkbox"/> <sub>1</sub> Highest<br><input type="checkbox"/> <sub>2</sub> Lowest                                                                                                                                                                                                                                                                                                                                                                                                                                                                                                                   |
| 61. What did you weigh at the time you became pregnant and what do you weigh now (in kilograms)?                      | When I became pregnant _____ kg<br>Now _____ kg                                                                                                                                                                                                                                                                                                                                                                                                                                                                                                                                                                 |
| 62. How tall are you?                                                                                                 | _____ cm                                                                                                                                                                                                                                                                                                                                                                                                                                                                                                                                                                                                        |
| 63. How tall is the baby's father                                                                                     | _____ cm                                                                                                                                                                                                                                                                                                                                                                                                                                                                                                                                                                                                        |
| 64. How much does the baby's father weigh?                                                                            | _____ kg                                                                                                                                                                                                                                                                                                                                                                                                                                                                                                                                                                                                        |

| <b>E. PREVIOUS PREGNANCIES</b>                                                                                                                                                                                                                                                         |                                                                                                                                                                                                                                                   |
|----------------------------------------------------------------------------------------------------------------------------------------------------------------------------------------------------------------------------------------------------------------------------------------|---------------------------------------------------------------------------------------------------------------------------------------------------------------------------------------------------------------------------------------------------|
| 65. Have you been pregnant before?<br>(Include all pregnancies that ended in abortion, miscarriage or stillbirth)                                                                                                                                                                      | <input type="checkbox"/> <sub>1</sub> Yes<br><input type="checkbox"/> <sub>2</sub> No <b>[If no, skip to Q67]</b>                                                                                                                                 |
| If yes, fill in for all earlier pregnancies.<br>[Include all pregnancies that ended in abortion, miscarriage or stillbirth as well as ectopic pregnancies].                                                                                                                            |                                                                                                                                                                                                                                                   |
| 66. Pregnancy No. 1                                                                                                                                                                                                                                                                    |                                                                                                                                                                                                                                                   |
| (a). Year of pregnancy _____                                                                                                                                                                                                                                                           | _____<br>year                                                                                                                                                                                                                                     |
| (b). Pregnancy outcome                                                                                                                                                                                                                                                                 | <input type="checkbox"/> <sub>1</sub> Live infant born<br><input type="checkbox"/> <sub>2</sub> Spontaneous abortion<br><input type="checkbox"/> <sub>3</sub> Termination of pregnancy<br><input type="checkbox"/> <sub>4</sub> Ectopic pregnancy |
| (c). Week of pregnancy for abortion/still birth                                                                                                                                                                                                                                        | _____<br>weeks                                                                                                                                                                                                                                    |
| (d). No. of months breast feeding                                                                                                                                                                                                                                                      | _____<br>months                                                                                                                                                                                                                                   |
| (e). Weight gain during pregnancy                                                                                                                                                                                                                                                      | _____<br>kg                                                                                                                                                                                                                                       |
| (f). Smoked during pregnancy                                                                                                                                                                                                                                                           | <input type="checkbox"/> <sub>1</sub> Yes<br><input type="checkbox"/> <sub>2</sub> No                                                                                                                                                             |
| <b>F. ILLNESSES AND HEALTH PROBLEMS DURING THIS PREGNANCY</b>                                                                                                                                                                                                                          |                                                                                                                                                                                                                                                   |
| <i>FOR PURPOSES OF UPLOADING A SHORTENED DOCUMENT, QUESTIONS HAVE BEEN DELETED FROM THIS SECTION</i>                                                                                                                                                                                   |                                                                                                                                                                                                                                                   |
| <b>G. PAST AND PRESENT ILLNESSES AND HEALTH PROBLEMS</b>                                                                                                                                                                                                                               |                                                                                                                                                                                                                                                   |
| Do you have or have you had any of the following illnesses or health problems? If you have taken medication (tablets, mixtures, suppositories, inhalers, creams, etc.) in conjunction with the illness or health problem give the name(s) of the medication(s) and when you took them. |                                                                                                                                                                                                                                                   |
| <i>FOR PURPOSES OF UPLOADING A SHORTENED DOCUMENT, QUESTIONS HAVE BEEN DELETED FROM THIS SECTION</i>                                                                                                                                                                                   |                                                                                                                                                                                                                                                   |
| <b>HABITS</b>                                                                                                                                                                                                                                                                          |                                                                                                                                                                                                                                                   |
| 67. Did your mother smoke when she was pregnant with you?                                                                                                                                                                                                                              | <input type="checkbox"/> <sub>1</sub> Yes<br><input type="checkbox"/> <sub>2</sub> No<br><input type="checkbox"/> Don't know                                                                                                                      |
| 68. Are you exposed to passive smoking at home?                                                                                                                                                                                                                                        | <input type="checkbox"/> <sub>1</sub> Yes<br><input type="checkbox"/> <sub>2</sub> No                                                                                                                                                             |
| 69. If yes, how many hours a day are you exposed to passive smoking?                                                                                                                                                                                                                   | _____ hours a day                                                                                                                                                                                                                                 |

|                                                                                                                                                                                                                                                                |                                                                                                                                            |
|----------------------------------------------------------------------------------------------------------------------------------------------------------------------------------------------------------------------------------------------------------------|--------------------------------------------------------------------------------------------------------------------------------------------|
| 70. Are you exposed to passive smoking at work?                                                                                                                                                                                                                | <input type="checkbox"/> <sub>1</sub> Yes<br><input type="checkbox"/> <sub>2</sub> No                                                      |
| 71. If yes, how many hours a day are you exposed to passive smoking?                                                                                                                                                                                           | _____ hours a day                                                                                                                          |
| 72. Did the baby's father smoke before you became pregnant?                                                                                                                                                                                                    | <input type="checkbox"/> <sub>1</sub> Yes<br><input type="checkbox"/> <sub>2</sub> No                                                      |
| 73. Does he smoke now?                                                                                                                                                                                                                                         | <input type="checkbox"/> <sub>1</sub> Yes<br><input type="checkbox"/> <sub>2</sub> No                                                      |
| 74. Have you ever smoked?                                                                                                                                                                                                                                      | <input type="checkbox"/> <sub>1</sub> Yes<br><input type="checkbox"/> <sub>2</sub> No (proceed question 104)                               |
| 75. Do you smoke now (after you became pregnant)?                                                                                                                                                                                                              | <input type="checkbox"/> <sub>1</sub> No<br><input type="checkbox"/> <sub>2</sub> Sometimes<br><input type="checkbox"/> <sub>3</sub> Daily |
| (a). If yes, how many                                                                                                                                                                                                                                          | _____ cigarettes per week<br>_____ cigarettes per day                                                                                      |
| 76. Did you smoke during the last 3 months before you became pregnant this time?                                                                                                                                                                               | <input type="checkbox"/> <sub>1</sub> No<br><input type="checkbox"/> <sub>2</sub> Sometimes<br><input type="checkbox"/> <sub>3</sub> Daily |
| (a). If yes, how many                                                                                                                                                                                                                                          | _____ cigarettes per week<br>_____ cigarettes per day                                                                                      |
| 77. How old were you when you started to smoke on a daily basis?                                                                                                                                                                                               | _____ years                                                                                                                                |
| 78. Have you stopped smoking completely?                                                                                                                                                                                                                       | <input type="checkbox"/> <sub>1</sub> Yes<br><input type="checkbox"/> <sub>2</sub> No                                                      |
| 79. If yes, how old were you when you stopped smoking?                                                                                                                                                                                                         | _____ years                                                                                                                                |
| 80. If you stopped smoking after you became pregnant, in which week of pregnancy did you stop?                                                                                                                                                                 | _____ week of pregnancy                                                                                                                    |
| For each of the following fluids, indicate whether you consumed them <b>before this pregnancy</b> and the amount (number of cups/glasses) per day (1 mug = 2 cups, 1 small plastic bottle (0.5 litre) = 4 cups, 1 large plastic bottle (1.5 litres) = 12 cups) |                                                                                                                                            |
| 81. Filter coffee (caffienated)                                                                                                                                                                                                                                | <input type="checkbox"/> <sub>1</sub> Yes<br><input type="checkbox"/> <sub>2</sub> No                                                      |
| (a). If yes, number of cups per day (see conversion above)                                                                                                                                                                                                     | _____ cups                                                                                                                                 |
| 82. Instant coffee (caffienated)                                                                                                                                                                                                                               | <input type="checkbox"/> <sub>1</sub> Yes<br><input type="checkbox"/> <sub>2</sub> No                                                      |
| (a). If yes, number of cups per day                                                                                                                                                                                                                            | _____ cups                                                                                                                                 |
| 83. Filter coffee (decaffienated)                                                                                                                                                                                                                              | <input type="checkbox"/> <sub>1</sub> Yes<br><input type="checkbox"/> <sub>2</sub> No                                                      |
| (a). If yes, number of cups per day                                                                                                                                                                                                                            | _____ cups                                                                                                                                 |
| 84. Instant coffee (decaffienated)                                                                                                                                                                                                                             | <input type="checkbox"/> <sub>1</sub> Yes<br><input type="checkbox"/> <sub>2</sub> No                                                      |
| (a). If yes, number of cups per day                                                                                                                                                                                                                            | _____ cups                                                                                                                                 |
| 85. Tea                                                                                                                                                                                                                                                        | <input type="checkbox"/> <sub>1</sub> Yes                                                                                                  |

|                                                 |                                           |
|-------------------------------------------------|-------------------------------------------|
|                                                 | <input type="checkbox"/> <sub>2</sub> No  |
| (a). If yes, number of cups per day             | _____ cups                                |
| 86. Herbal tea                                  | <input type="checkbox"/> <sub>1</sub> Yes |
|                                                 | <input type="checkbox"/> <sub>2</sub> No  |
| (a). If yes, number of cups per day             | _____ cups                                |
| 87. Fizzy drinks (Coke, Sprite, etc)            | <input type="checkbox"/> <sub>1</sub> Yes |
|                                                 | <input type="checkbox"/> <sub>2</sub> No  |
| (a). If yes, number of cups per day             | _____ cups                                |
| 88. Diet fizzy drinks                           | <input type="checkbox"/> <sub>1</sub> Yes |
|                                                 | <input type="checkbox"/> <sub>2</sub> No  |
| (a). If yes, number of cups per day             | _____ cups                                |
| 89. Tap water                                   | <input type="checkbox"/> <sub>1</sub> Yes |
|                                                 | <input type="checkbox"/> <sub>2</sub> No  |
| (a). If yes, number of cups per day             | _____ cups                                |
| 90. Bottled water                               | <input type="checkbox"/> <sub>1</sub> Yes |
|                                                 | <input type="checkbox"/> <sub>2</sub> No  |
| (a). If yes, number of cups per day             | _____ cups                                |
| 91. Pure fruit juices (100%)                    | <input type="checkbox"/> <sub>1</sub> Yes |
|                                                 | <input type="checkbox"/> <sub>2</sub> No  |
| (a). If yes, number of cups per day             | _____ cups                                |
| 92. Fruit juice blends                          | <input type="checkbox"/> <sub>1</sub> Yes |
|                                                 | <input type="checkbox"/> <sub>2</sub> No  |
| (a). If yes, number of cups per day             | _____ cups                                |
| 93. Fruit juice concentrate                     | <input type="checkbox"/> <sub>1</sub> Yes |
|                                                 | <input type="checkbox"/> <sub>2</sub> No  |
| (a). If yes, number of cups per day             | _____ cups                                |
| 94. Milk                                        | <input type="checkbox"/> <sub>1</sub> Yes |
|                                                 | <input type="checkbox"/> <sub>2</sub> No  |
| (a). If yes, number of cups per day             | _____ cups                                |
| 95. Yogurt, all types                           | <input type="checkbox"/> <sub>1</sub> Yes |
|                                                 | <input type="checkbox"/> <sub>2</sub> No  |
| (a). If yes, number of cups per day             | _____ cups                                |
| 96. Yogurt with active Lactobacillus, all types | <input type="checkbox"/> <sub>1</sub> Yes |
|                                                 | <input type="checkbox"/> <sub>2</sub> No  |
| (a). If yes, number of cups per day             | _____ cups                                |
| 97. Other sour milk                             | <input type="checkbox"/> <sub>1</sub> Yes |
|                                                 | <input type="checkbox"/> <sub>2</sub> No  |
| (a). If yes, number of cups per day             | _____ cups                                |
| 98. Other _____                                 | <input type="checkbox"/> <sub>1</sub> Yes |
|                                                 | <input type="checkbox"/> <sub>2</sub> No  |



|                                                                                                                                                                                                                                                                                                                                   |                                                                                                                                                                                                                                                                                                                                                                                                                                                                                |
|-----------------------------------------------------------------------------------------------------------------------------------------------------------------------------------------------------------------------------------------------------------------------------------------------------------------------------------|--------------------------------------------------------------------------------------------------------------------------------------------------------------------------------------------------------------------------------------------------------------------------------------------------------------------------------------------------------------------------------------------------------------------------------------------------------------------------------|
| (a). If yes, number of cups per day                                                                                                                                                                                                                                                                                               | _____ cups                                                                                                                                                                                                                                                                                                                                                                                                                                                                     |
|                                                                                                                                                                                                                                                                                                                                   |                                                                                                                                                                                                                                                                                                                                                                                                                                                                                |
|                                                                                                                                                                                                                                                                                                                                   |                                                                                                                                                                                                                                                                                                                                                                                                                                                                                |
| 99. Have you ever consumed alcohol?                                                                                                                                                                                                                                                                                               | <input type="checkbox"/> <sub>1</sub> Yes<br><input type="checkbox"/> <sub>2</sub> No <b>[If no, skip all]</b>                                                                                                                                                                                                                                                                                                                                                                 |
| Alcohol units are used to compare the different types of alcoholic beverages. 1 alcohol unit (= 1.5 cl. pure alcohol) is equivalent to:<br>1 bottle/can energy drink or cider<br>1 glass (1/3 liter) of beer<br>1 wine glass red or white wine<br>1 wine glass sherry or other fortified wine<br>1 snaps glass spirits or liqueur |                                                                                                                                                                                                                                                                                                                                                                                                                                                                                |
| 100. How often did you consume alcohol in the 3 months before you became pregnant?                                                                                                                                                                                                                                                | <input type="checkbox"/> <sub>1</sub> Approximately 6-7 time a week<br><input type="checkbox"/> <sub>2</sub> Approximately 4-5 times a week<br><input type="checkbox"/> <sub>3</sub> approximately 2-3 times a week<br><input type="checkbox"/> <sub>4</sub> approximately once a week<br><input type="checkbox"/> <sub>5</sub> approximately 1-3 times a month<br><input type="checkbox"/> <sub>6</sub> less than once a month<br><input type="checkbox"/> <sub>7</sub> Never |
| 101. How often do you consume alcohol during this pregnancy?                                                                                                                                                                                                                                                                      | <input type="checkbox"/> <sub>1</sub> Approximately 6-7 time a week<br><input type="checkbox"/> <sub>2</sub> Approximately 4-5 times a week<br><input type="checkbox"/> <sub>3</sub> approximately 2-3 times a week<br><input type="checkbox"/> <sub>4</sub> approximately once a week<br><input type="checkbox"/> <sub>5</sub> approximately 1-3 times a month<br><input type="checkbox"/> <sub>6</sub> less than once a month<br><input type="checkbox"/> <sub>7</sub> Never |
| 102. What type of alcohol do you usually drink? ( <i>Fill in one or several boxes.</i> )                                                                                                                                                                                                                                          | <input type="checkbox"/> <sub>1</sub> Light beer<br><input type="checkbox"/> <sub>2</sub> Beer<br><input type="checkbox"/> <sub>3</sub> Red wine<br><input type="checkbox"/> <sub>4</sub> White wine<br><input type="checkbox"/> <sub>5</sub> Low alcohol sodas<br><input type="checkbox"/> <sub>6</sub> Fortified wines ( <i>sherry, port wine, Madeira</i> )/ <input type="checkbox"/> <sub>7</sub> Spirits ( <i>vodka, gin, snaps, cognac, whisky, liqueur</i> )            |
| 103. Did you drink 5 units or more at least once during the last 3 months before this pregnancy?                                                                                                                                                                                                                                  | <input type="checkbox"/> <sub>1</sub> Several times per week<br><input type="checkbox"/> <sub>2</sub> Once a week<br><input type="checkbox"/> <sub>3</sub> 1-3 times a month<br><input type="checkbox"/> <sub>4</sub> Less than once a month<br><input type="checkbox"/> <sub>5</sub> Never                                                                                                                                                                                    |
| 104. Did you drink 5 units or more at least once during this pregnancy?                                                                                                                                                                                                                                                           | <input type="checkbox"/> <sub>1</sub> Several times per week<br><input type="checkbox"/> <sub>2</sub> Once a week<br><input type="checkbox"/> <sub>3</sub> 1-3 times a month<br><input type="checkbox"/> <sub>4</sub> Less than once a month<br><input type="checkbox"/> <sub>5</sub> Never                                                                                                                                                                                    |
| 105. How many units of alcohol did you usually drink when you consume alcohol in the last 3 months before pregnancy?                                                                                                                                                                                                              | <input type="checkbox"/> <sub>1</sub> 10 or more<br><input type="checkbox"/> <sub>2</sub> 7-9<br><input type="checkbox"/> <sub>3</sub> 5-6<br><input type="checkbox"/> <sub>4</sub> 3-4<br><input type="checkbox"/> <sub>4</sub> 1-2<br><input type="checkbox"/> <sub>5</sub> Less that 1                                                                                                                                                                                      |

106. How many units of alcohol do you usually drink when you consume alcohol during this pregnancy?

- <sub>1</sub> 10 or more
- <sub>2</sub> 7-9
- <sub>3</sub> 5-6
- <sub>4</sub> 3-4
- <sub>4</sub> 1-2
- <sub>5</sub> Less than 1
